# Supplementary material for: Synthesis and evaluation of poly(propylene fumarate)-grafted graphene oxide as nanofiller for porous scaffolds
Source: Royal Society of Chemistry journal article supplement (doi:10.1039/d3tb01232h), 2023-01-01
Supplement: d3tb01232h1.pdf [file d3tb01232h1.pdf]

## SUPPORTING INFORMATION

### **Synthesis and evaluation of poly(propylene fumarate)-grafted graphene oxide as nanofiller for porous scaffolds**

Andreea M. Pandele<sup>1,2</sup>, Aida Selaru<sup>3</sup>, Sorina Dinescu<sup>3</sup>, Marieta Costache<sup>3</sup>, Eugeniu Vasile<sup>4</sup>, Constanța Dascălu<sup>5</sup>, Matei D. Raicopol<sup>6\*</sup>, Mircea Teodorescu<sup>7</sup>

<sup>1</sup>Advanced Polymer Materials Group, University Politehnica of Bucharest, 1-7 Gheorghe Polizu St., 011061, Bucharest, Romania

<sup>2</sup>Department of Analytical Chemistry and Environmental Engineering, University Politehnica of Bucharest, 1-7 Gheorghe Polizu St., 011061, Bucharest, Romania

<sup>3</sup>Department of Biochemistry and Molecular Biology, University of Bucharest, 91-95 Splaiul Independentei, 050095, Bucharest, Romania

<sup>4</sup>Department of Science and Engineering of Oxide Materials and Nanomaterials, University Politehnica of Bucharest, 1-7 Gheorghe Polizu St., 011061, Bucharest, Romania

<sup>5</sup>Department of Physics, University Politehnica of Bucharest, 313 Splaiul Independenței, 060042, Bucharest, Romania

<sup>6</sup>Costin Nenitzescu” Department of Organic Chemistry, University Politehnica of Bucharest, 1-7 Gheorghe Polizu St., 011061, Bucharest, Romania

<sup>7</sup>Department of Bioresources and Polymer Science, University Politehnica of Bucharest, 1-7 Gheorghe Polizu St., 011061, Bucharest, Romania

\*Corresponding author: [m\\_raicopol@chim.upb.ro](mailto:m_raicopol@chim.upb.ro); Tel. +40214023912

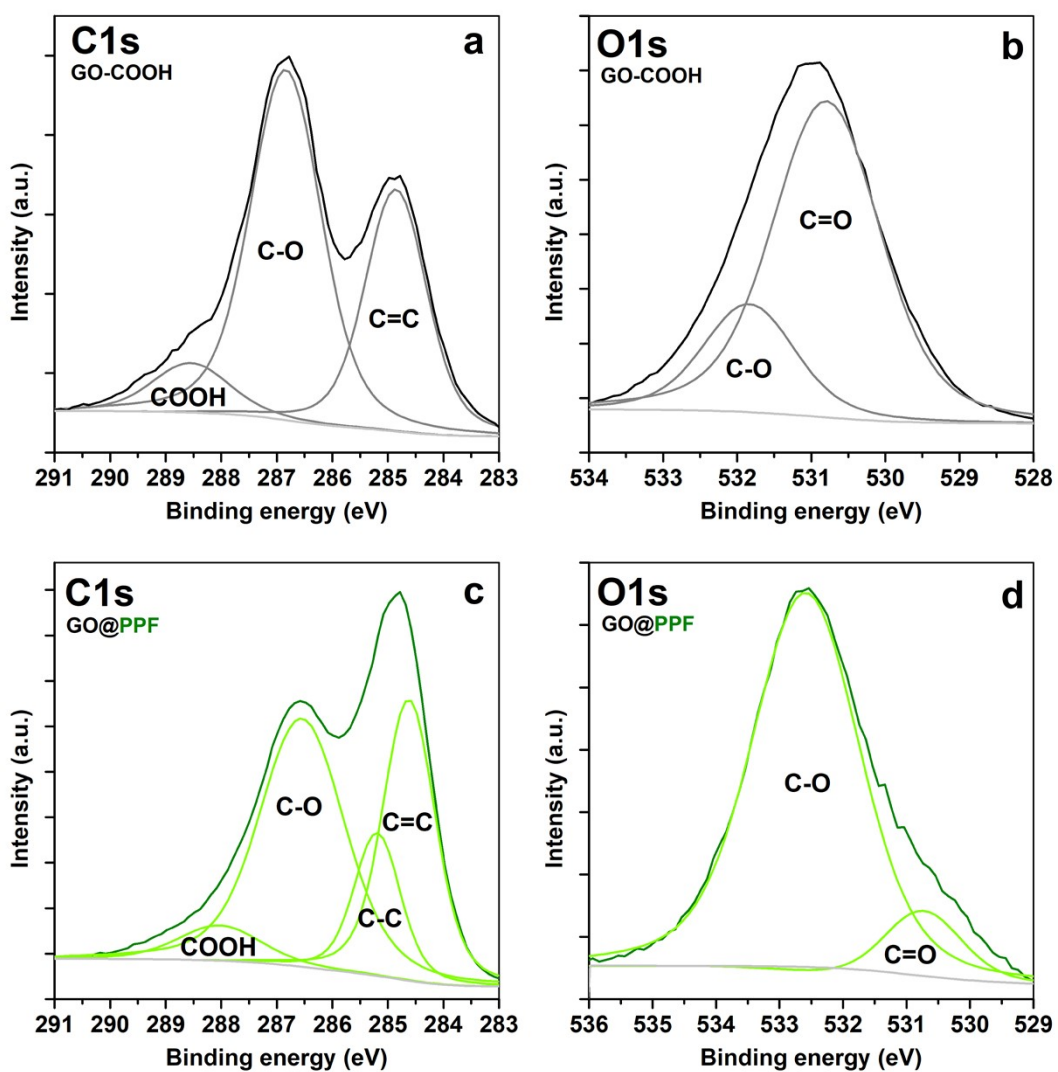

**Figure S1.** C1s and O1s core-level spectra of GO-COOH and GO@PPF.

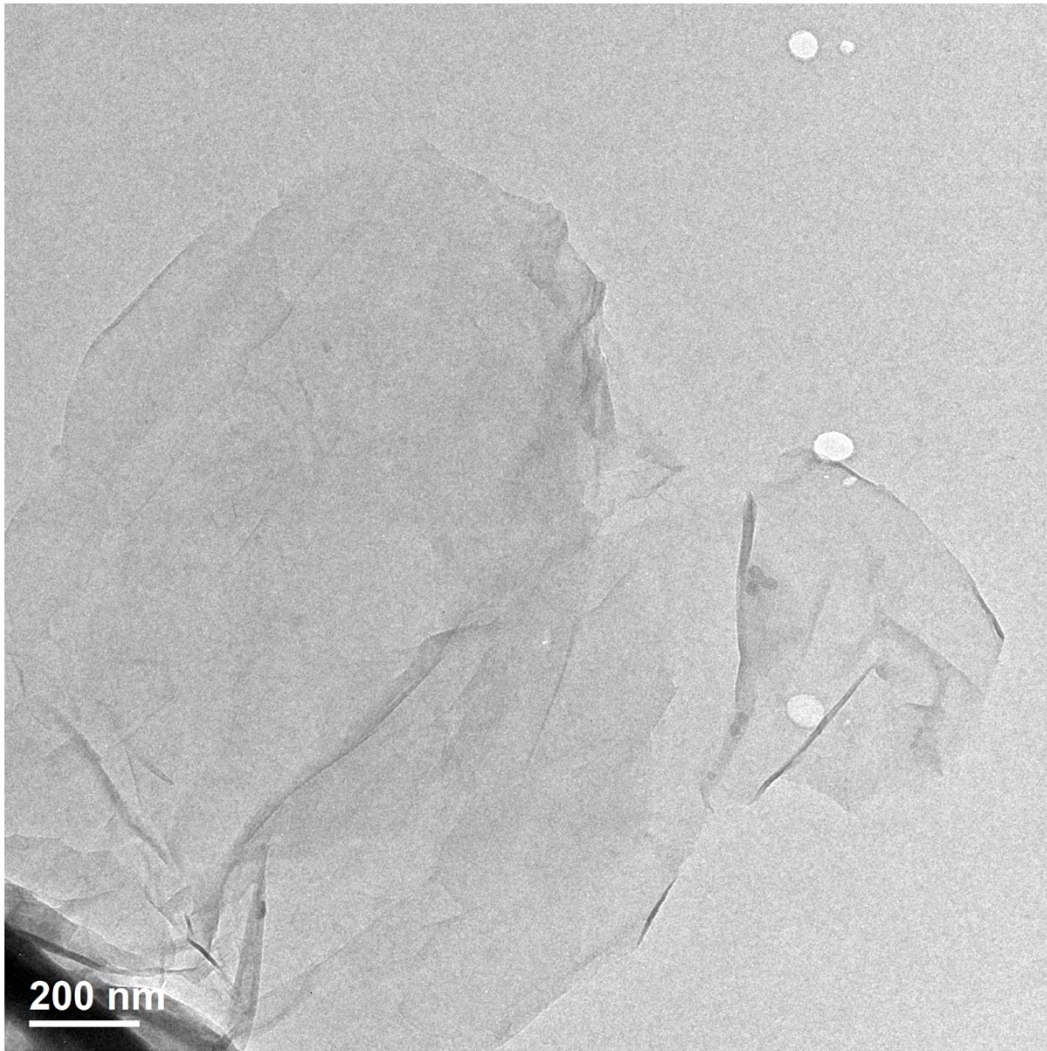

**Figure S2.** TEM micrograph of GO@PPF.

**Table S1.** Thermal gravimetric analysis (TGA) results for neat PPF/PVP and PPF/PVP scaffolds containing GO@PPF.

| <b>Sample name</b>       | <b>Residual mass (%)</b> | <b>Td<sub>5%</sub> (°C)</b> | <b>Td<sub>10%</sub> (°C)</b> | <b>Td<sub>max</sub> (°C)</b> |
|--------------------------|--------------------------|-----------------------------|------------------------------|------------------------------|
| PPF/PVP                  | 6.6                      | 255                         | 300                          | 357                          |
| PPF/PVP/GO@PPF 0.25 wt.% | 9.0                      | 284                         | 308                          | 366                          |
| PPF/PVP/GO@PPF 0.5 wt.%  | 13.6                     | 293                         | 314                          | 359                          |
| PPF/PVP/GO@PPF 1.0 wt.%  | 14.5                     | 294                         | 312                          | 360                          |
